# Supplementary material for: Manganese-Enhanced T1 Mapping in the Myocardium of Normal and Infarcted Hearts
Source: Contrast Media Mol Imaging. 2018 Oct 25;2018:9641527. doi: 10.1155/2018/9641527 (PMC6222240; doi:10.1155/2018/9641527)
Supplement: Supplementary Materials — S1: normalisation of T1 maps. S2: inter-/intraobserver variability studies for myocardial ROI contouring methodology. [file 9641527.f1.zip]

Archive with 4 entries (4 files):
- 9641527.f1/Figure_S1-1_CMMI_2418646.eps
- 9641527.f1/Figure_S1-2_CMMI_2418647.eps
- 9641527.f1/Figure_S2-1_CMMI_2418648.eps
- 9641527.f1/Preclinical MEMRI Supplemental Material v2.2.docx
